# Supplementary material for: Temperature-tunable wettability on a bioinspired structured graphene surface for fog collection and unidirectional transport
Source: Royal Society of Chemistry journal article supplement (doi:10.1039/c7nr07728a), 2018-01-01
Supplement: c7nr07728a1.pdf [file c7nr07728a1.pdf]

## Supporting Information

### Temperature-tunable wettability on bioinspired structured graphene surface for fog collection and unidirectional transport

Yunyun Song, Yan Liu\*, Haobo Jiang, Shuyi Li, Cigdem Kaya, Thomas Stegmaier,  
Zhiwu Han, Luquan Ren

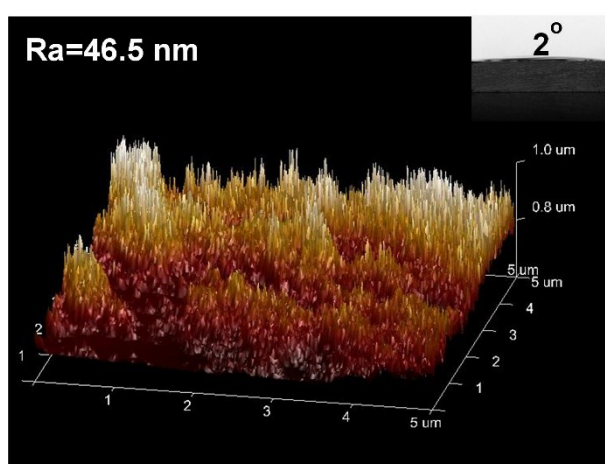

**Figure S1.** 3D morphology of super hydrophilic glass (inset in S2 shows the water drop profile on the super hydrophilic glass).

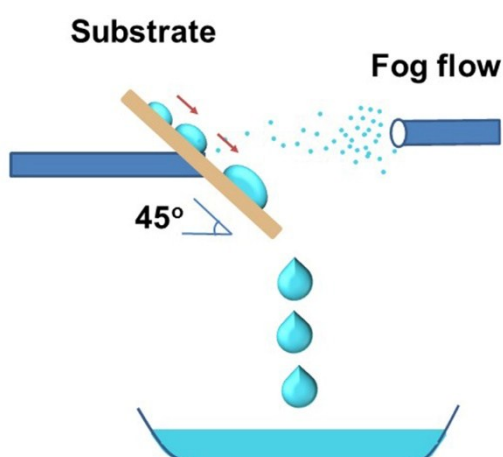

**Figure S2.** Schematic illustration of the method used to quantitatively measure the fog collection efficiency of different surfaces. The substrate is inclined by 45° from the horizontal plane. A fog flow (~45 cm/s in velocity) containing numerous tiny water droplets is generated by a humidifier. Water droplets are collected on the

substrates at first and then roll into a collector. The total weight of the collected water is measured after 1 h to evaluate fog-collecting efficiency.

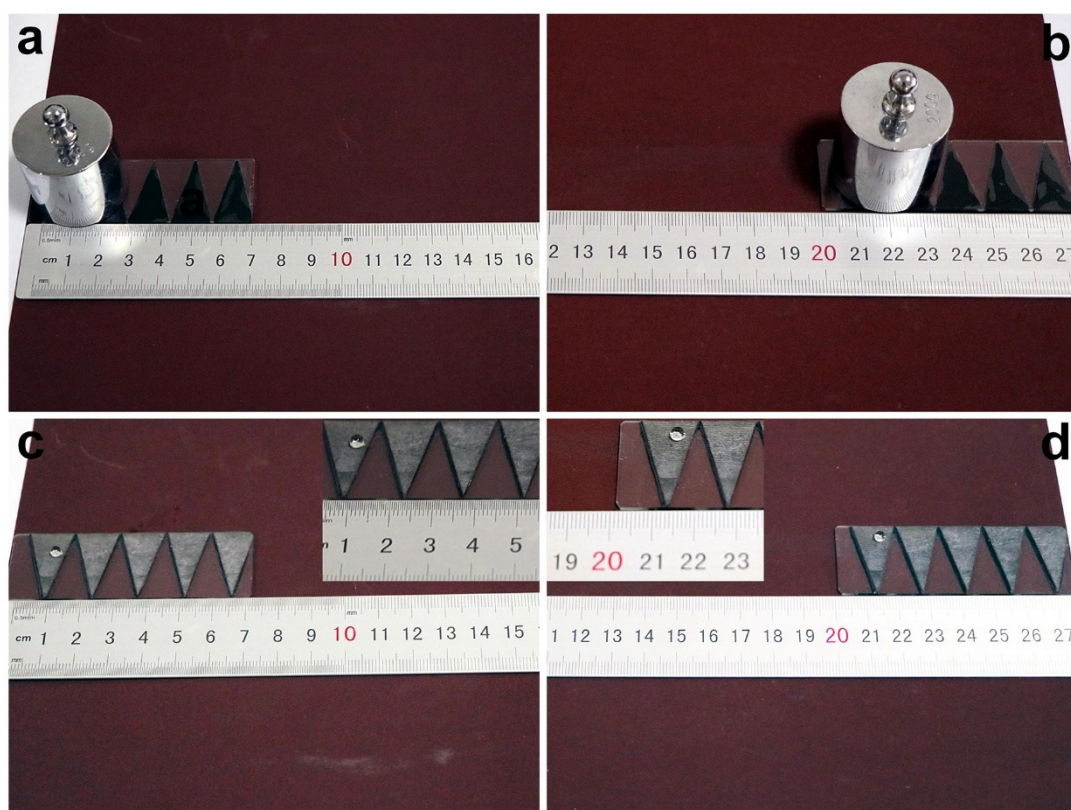

**Figure S3.** (a) and (b) illustrated the as-prepared sample was sand wiced in the middle of # 1000 sand paper and 200 g weight, and the route of weight from 0 cm to 20 cm measured by rule. (c) Before abrasion the as-prepared sample acquired a contact angle of  $164.3^\circ$ . (d) after abrasion, the water contact angle was about  $\sim 158^\circ$ .

**Vedio 1.** We spread the water drops on the low adhesive superhydrophobic surface and water drops of volume  $10\mu\text{L}$  were rolled on the surface with the help of a dropper. The rolling water drop could easily roll from the surface with quartz sand, keeping it clean and dust free.
